# Supplementary material for: Molecular characterization of CNS paragangliomas identifies cauda equina paragangliomas as a distinct tumor entity
Source: PubMed Central journal article supplement (PMC7666289; doi:10.1007/s00401-020-02218-7), 2020-09-14

Supplementary Figure 1

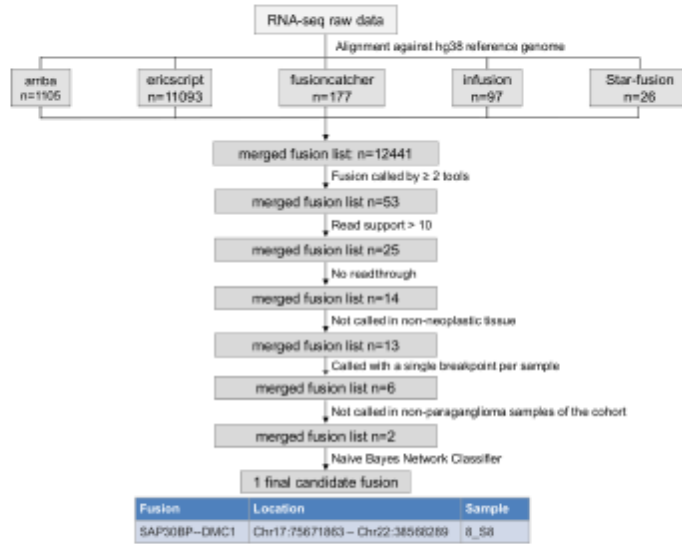

Supplement: 401_2020_2218_MOESM3_ESM.pdf [file 401_2020_2218_MOESM3_ESM.pdf]
